# Supplementary material for: Identification of tryptophan metabolic gene-related subtypes, development of prognostic models, and characterization of tumor microenvironment infiltration in gliomas
Source: Frontiers journal article supplement (doi:10.3389/fnmol.2022.1037835), 2022-11-04
Supplement: Table_1.XLS [file Table_1.XLS]

## Sheet: Supplementary Table S1
Clinical information of TCGA and CGGA cohort
ID	Age	Gender	Grade	Fustat	Futime(year)
TCGA-WY-A85E	>=45	Female	WHOI-WHOII	Alive	4.10959
TCGA-WY-A85D	>=45	Male	WHOI-WHOII	Alive	4.35068
TCGA-WY-A85C	<45	Male	WHOI-WHOII	Alive	2.59178
TCGA-WY-A85B	<45	Male	WHOI-WHOII	Alive	0.0109589
TCGA-WY-A85A	<45	Male	WHOI-WHOII	Alive	1.65753
TCGA-WY-A859	<45	Female	WHOI-WHOII	Alive	0.531507
TCGA-WY-A858	<45	Female	WHOIII-WHOIV	Alive	1.01918
TCGA-WH-A86K	<45	Male	WHOI-WHOII	Dead	1.10411
TCGA-W9-A837	>=45	Male	WHOI-WHOII	Alive	7.12877
TCGA-VW-A8FI	>=45	Male	WHOIII-WHOIV	Dead	0.786301
TCGA-VW-A7QS	<45	Female	WHOIII-WHOIV	Alive	2.75068
TCGA-VV-A86M	<45	Female	WHOIII-WHOIV	Alive	1.67397
TCGA-VV-A829	>=45	Male	WHOIII-WHOIV	Alive	2.48767
TCGA-VM-A8CH	<45	Female	WHOI-WHOII	Alive	2.55616
TCGA-VM-A8CF	<45	Female	WHOIII-WHOIV	Alive	0.545205
TCGA-VM-A8CE	<45	Male	WHOI-WHOII	Alive	3.66301
TCGA-VM-A8CD	>=45	Male	WHOIII-WHOIV	Dead	2.12329
TCGA-VM-A8CB	<45	Male	WHOIII-WHOIV	Alive	2.1589
TCGA-VM-A8CA	>=45	Male	WHOI-WHOII	Alive	2.95616
TCGA-VM-A8C9	<45	Female	WHOI-WHOII	Alive	2.15068
TCGA-VM-A8C8	>=45	Female	WHOI-WHOII	Alive	4.56438
TCGA-TQ-A8XE	>=45	Female	WHOI-WHOII	Dead	2.16986
TCGA-TQ-A7RW	<45	Male	WHOI-WHOII	Dead	3.03014
TCGA-TQ-A7RV	<45	Male	WHOI-WHOII	Alive	3.81644
TCGA-TQ-A7RR	<45	Male	WHOI-WHOII	Alive	15.1945
TCGA-TQ-A7RQ	<45	Female	WHOI-WHOII	Alive	1.24658
TCGA-TQ-A7RP	<45	Male	WHOI-WHOII	Dead	6.26575
TCGA-TQ-A7RO	<45	Male	WHOI-WHOII	Alive	7.96438
TCGA-TQ-A7RN	<45	Male	WHOI-WHOII	Alive	3.65753
TCGA-TQ-A7RM	<45	Female	WHOIII-WHOIV	Alive	7.92603
TCGA-TQ-A7RK	<45	Male	WHOI-WHOII	Alive	1.79726
TCGA-TQ-A7RJ	<45	Female	WHOI-WHOII	Alive	6.83014
TCGA-TQ-A7RI	<45	Female	WHOI-WHOII	Alive	0.70411
TCGA-TQ-A7RH	<45	Male	WHOI-WHOII	Alive	0.923288
TCGA-TQ-A7RG	<45	Male	WHOI-WHOII	Alive	0.969863
TCGA-TQ-A7RF	<45	Female	WHOIII-WHOIV	Alive	2.0137
TCGA-TM-A84T	<45	Male	WHOI-WHOII	Alive	4.17808
TCGA-TM-A84S	<45	Male	WHOIII-WHOIV	Alive	1.18082
TCGA-TM-A84R	>=45	Male	WHOI-WHOII	Alive	1.12603
TCGA-TM-A84Q	<45	Male	WHOI-WHOII	Alive	4.05753
TCGA-TM-A84O	>=45	Female	WHOIII-WHOIV	Dead	3.49863
TCGA-TM-A84M	<45	Male	WHOIII-WHOIV	Alive	2.18082
TCGA-TM-A84L	<45	Male	WHOI-WHOII	Dead	1.54247
TCGA-TM-A84J	>=45	Male	WHOIII-WHOIV	Alive	6.27123
TCGA-TM-A84I	<45	Male	WHOIII-WHOIV	Alive	2.03562
TCGA-TM-A84H	>=45	Female	WHOIII-WHOIV	Alive	1.98356
TCGA-TM-A84G	>=45	Female	WHOIII-WHOIV	Alive	6.27123
TCGA-TM-A84F	>=45	Male	WHOIII-WHOIV	Alive	11.5863
TCGA-TM-A84C	<45	Male	WHOI-WHOII	Dead	3.90685
TCGA-TM-A84B	<45	Male	WHOIII-WHOIV	Dead	0.824658
TCGA-TM-A7CF	<45	Female	WHOI-WHOII	Alive	2.40548
TCGA-TM-A7CA	>=45	Male	WHOI-WHOII	Alive	0.490411
TCGA-TM-A7C5	<45	Male	WHOI-WHOII	Alive	11.1452
TCGA-TM-A7C4	<45	Female	WHOI-WHOII	Alive	3.2411
TCGA-TM-A7C3	<45	Female	WHOIII-WHOIV	Dead	1.54521
TCGA-S9-A89Z	<45	Male	WHOIII-WHOIV	Alive	0.0273973
TCGA-S9-A89V	>=45	Male	WHOIII-WHOIV	Alive	1.66575
TCGA-S9-A7R8	>=45	Female	WHOIII-WHOIV	Dead	1.70685
TCGA-S9-A7R7	<45	Male	WHOI-WHOII	Alive	3.31507
TCGA-S9-A7R4	>=45	Male	WHOIII-WHOIV	Alive	1.75068
TCGA-S9-A7R3	<45	Female	WHOI-WHOII	Alive	2.48767
TCGA-S9-A7R2	>=45	Male	WHOIII-WHOIV	Dead	2.6411
TCGA-S9-A7R1	<45	Male	WHOI-WHOII	Dead	1.43288
TCGA-S9-A7QZ	<45	Male	WHOI-WHOII	Alive	1.46027
TCGA-S9-A7QY	<45	Female	WHOI-WHOII	Alive	1.34521
TCGA-S9-A7QX	<45	Female	WHOIII-WHOIV	Alive	5.11781
TCGA-S9-A7QW	>=45	Female	WHOIII-WHOIV	Alive	0.312329
TCGA-S9-A7J3	>=45	Female	WHOIII-WHOIV	Alive	4.29315
TCGA-S9-A7J2	<45	Male	WHOIII-WHOIV	Alive	11.189
TCGA-S9-A7J1	>=45	Male	WHOI-WHOII	Alive	0.309589
TCGA-S9-A7J0	<45	Female	WHOIII-WHOIV	Alive	3.08767
TCGA-S9-A7IZ	>=45	Female	WHOIII-WHOIV	Alive	0.00821918
TCGA-S9-A7IY	<45	Male	WHOIII-WHOIV	Alive	3.09589
TCGA-S9-A7IX	>=45	Male	WHOIII-WHOIV	Dead	1.34795
TCGA-S9-A7IS	<45	Female	WHOIII-WHOIV	Dead	0.386301
TCGA-S9-A7IQ	>=45	Female	WHOI-WHOII	Alive	1.9589
TCGA-S9-A6WQ	>=45	Female	WHOI-WHOII	Alive	0.991781
TCGA-S9-A6WP	<45	Male	WHOIII-WHOIV	Alive	3.15616
TCGA-S9-A6WO	<45	Male	WHOI-WHOII	Alive	4.21918
TCGA-S9-A6WN	<45	Female	WHOIII-WHOIV	Alive	0.857534
TCGA-S9-A6WM	>=45	Female	WHOIII-WHOIV	Alive	1.87945
TCGA-S9-A6WL	>=45	Male	WHOIII-WHOIV	Alive	1.35342
TCGA-S9-A6WI	>=45	Female	WHOI-WHOII	Alive	2.79726
TCGA-S9-A6WH	<45	Female	WHOI-WHOII	Dead	1.63288
TCGA-S9-A6WG	<45	Male	WHOIII-WHOIV	Alive	0.632877
TCGA-S9-A6WE	<45	Male	WHOI-WHOII	Alive	1.48493
TCGA-S9-A6WD	>=45	Male	WHOIII-WHOIV	Alive	3.72329
TCGA-S9-A6UB	>=45	Male	WHOI-WHOII	Alive	1.77534
TCGA-S9-A6UA	>=45	Male	WHOIII-WHOIV	Dead	2.12329
TCGA-S9-A6U9	<45	Male	WHOIII-WHOIV	Alive	0.556164
TCGA-S9-A6U8	<45	Male	WHOI-WHOII	Dead	1.55342
TCGA-S9-A6U6	<45	Male	WHOIII-WHOIV	Alive	0.230137
TCGA-S9-A6U5	<45	Male	WHOI-WHOII	Alive	1.39452
TCGA-S9-A6U2	>=45	Female	WHOI-WHOII	Alive	1.27945
TCGA-S9-A6U1	<45	Female	WHOIII-WHOIV	Alive	3.06849
TCGA-S9-A6U0	>=45	Male	WHOIII-WHOIV	Dead	1.94247
TCGA-S9-A6TZ	<45	Female	WHOI-WHOII	Alive	9.50685
TCGA-S9-A6TY	>=45	Male	WHOI-WHOII	Alive	4.23836
TCGA-S9-A6TX	>=45	Male	WHOIII-WHOIV	Alive	5.24658
TCGA-S9-A6TW	<45	Male	WHOIII-WHOIV	Alive	2.50411
TCGA-S9-A6TV	>=45	Male	WHOIII-WHOIV	Alive	0.476712
TCGA-S9-A6TU	<45	Male	WHOI-WHOII	Alive	3.3863
TCGA-S9-A6TS	>=45	Female	WHOIII-WHOIV	Dead	0.136986
TCGA-RY-A847	>=45	Male	WHOI-WHOII	Alive	1.13973
TCGA-RY-A845	<45	Female	WHOI-WHOII	Alive	1.2137
TCGA-RY-A843	<45	Male	WHOIII-WHOIV	Alive	1.06301
TCGA-RY-A840	>=45	Male	WHOIII-WHOIV	Alive	0.0191781
TCGA-RY-A83Z	>=45	Female	WHOIII-WHOIV	Alive	3.99452
TCGA-RY-A83Y	>=45	Male	WHOI-WHOII	Alive	2.17808
TCGA-RY-A83X	>=45	Female	WHOI-WHOII	Alive	5.62192
TCGA-R8-A73M	>=45	Female	WHOI-WHOII	Alive	1.24932
TCGA-R8-A6MO	>=45	Female	WHOI-WHOII	Alive	1.11781
TCGA-R8-A6ML	>=45	Male	WHOIII-WHOIV	Alive	1.55068
TCGA-R8-A6MK	<45	Male	WHOI-WHOII	Alive	2.72055
TCGA-QH-A870	<45	Female	WHOIII-WHOIV	Alive	0.969863
TCGA-QH-A86X	<45	Male	WHOI-WHOII	Alive	9.78356
TCGA-QH-A6XC	>=45	Male	WHOIII-WHOIV	Alive	4.34247
TCGA-QH-A6XA	<45	Female	WHOI-WHOII	Alive	3.14247
TCGA-QH-A6X9	<45	Female	WHOI-WHOII	Dead	3.40274
TCGA-QH-A6X8	>=45	Female	WHOIII-WHOIV	Alive	3.83836
TCGA-QH-A6X5	>=45	Female	WHOI-WHOII	Alive	2.31781
TCGA-QH-A6X4	>=45	Male	WHOIII-WHOIV	Alive	0.558904
TCGA-QH-A6X3	<45	Male	WHOI-WHOII	Alive	1.13425
TCGA-QH-A6CZ	<45	Male	WHOI-WHOII	Alive	3.05479
TCGA-QH-A6CY	<45	Male	WHOIII-WHOIV	Alive	0.00273973
TCGA-QH-A6CX	<45	Female	WHOIII-WHOIV	Alive	0.306849
TCGA-QH-A6CW	<45	Male	WHOIII-WHOIV	Alive	3.4274
TCGA-QH-A6CV	>=45	Male	WHOIII-WHOIV	Alive	2.06575
TCGA-QH-A6CU	>=45	Female	WHOIII-WHOIV	Alive	3.36164
TCGA-QH-A6CS	<45	Male	WHOIII-WHOIV	Alive	1.2
TCGA-QH-A65Z	>=45	Male	WHOI-WHOII	Alive	1.57808
TCGA-QH-A65X	<45	Female	WHOIII-WHOIV	Alive	1.34795
TCGA-QH-A65V	>=45	Female	WHOI-WHOII	Alive	1.14795
TCGA-QH-A65S	<45	Female	WHOI-WHOII	Alive	1.65479
TCGA-QH-A65R	<45	Female	WHOIII-WHOIV	Alive	3.7863
TCGA-P5-A781	<45	Female	WHOIII-WHOIV	Alive	1.01918
TCGA-P5-A780	>=45	Female	WHOIII-WHOIV	Alive	1.14521
TCGA-P5-A77X	>=45	Female	WHOI-WHOII	Alive	1.93425
TCGA-P5-A77W	<45	Female	WHOIII-WHOIV	Alive	3.86849
TCGA-P5-A737	>=45	Male	WHOI-WHOII	Alive	1.05205
TCGA-P5-A736	>=45	Female	WHOIII-WHOIV	Alive	0.863014
TCGA-P5-A735	<45	Female	WHOI-WHOII	Alive	0.0410959
TCGA-P5-A733	>=45	Female	WHOI-WHOII	Alive	0.8
TCGA-P5-A731	>=45	Female	WHOI-WHOII	Alive	1.39178
TCGA-P5-A730	<45	Male	WHOIII-WHOIV	Alive	0.586301
TCGA-P5-A72Z	>=45	Female	WHOIII-WHOIV	Alive	3.83836
TCGA-P5-A72X	<45	Male	WHOIII-WHOIV	Alive	1.37808
TCGA-P5-A72W	<45	Male	WHOIII-WHOIV	Alive	1.21096
TCGA-P5-A72U	<45	Female	WHOIII-WHOIV	Dead	1.45479
TCGA-P5-A5F6	<45	Male	WHOI-WHOII	Alive	8.1863
TCGA-P5-A5F4	<45	Female	WHOIII-WHOIV	Alive	1.24658
TCGA-P5-A5F2	<45	Female	WHOI-WHOII	Alive	5.00822
TCGA-P5-A5F1	<45	Male	WHOI-WHOII	Alive	0.657534
TCGA-P5-A5F0	<45	Male	WHOI-WHOII	Alive	1.21096
TCGA-P5-A5EZ	<45	Male	WHOIII-WHOIV	Alive	1.49041
TCGA-P5-A5EY	<45	Male	WHOI-WHOII	Alive	3.34247
TCGA-P5-A5EX	<45	Female	WHOIII-WHOIV	Alive	8.91233
TCGA-P5-A5EW	<45	Female	WHOI-WHOII	Alive	2.61918
TCGA-P5-A5EV	<45	Male	WHOI-WHOII	Alive	2.95342
TCGA-KT-A7W1	>=45	Female	WHOIII-WHOIV	Alive	0.49863
TCGA-KT-A74X	<45	Male	WHOIII-WHOIV	Alive	1.46027
TCGA-IK-8125	>=45	Male	WHOIII-WHOIV	Alive	1.27945
TCGA-IK-7675	>=45	Male	WHOI-WHOII	Dead	3.04658
TCGA-HW-A5KM	<45	Male	WHOI-WHOII	Alive	2.35616
TCGA-HW-A5KL	<45	Female	WHOI-WHOII	Alive	1.55068
TCGA-HW-A5KK	>=45	Male	WHOIII-WHOIV	Dead	2.56164
TCGA-HW-A5KJ	>=45	Male	WHOIII-WHOIV	Dead	0.663014
TCGA-HW-8322	<45	Male	WHOI-WHOII	Alive	0.520548
TCGA-HW-8321	<45	Male	WHOIII-WHOIV	Alive	1.26301
TCGA-HW-8320	<45	Male	WHOIII-WHOIV	Alive	8.25479
TCGA-HW-8319	<45	Female	WHOIII-WHOIV	Dead	1.10959
TCGA-HW-7495	>=45	Female	WHOI-WHOII	Alive	1.77534
TCGA-HW-7493	<45	Female	WHOI-WHOII	Alive	1.86849
TCGA-HW-7491	<45	Male	WHOI-WHOII	Alive	1.25205
TCGA-HW-7490	<45	Male	WHOI-WHOII	Alive	0.172603
TCGA-HW-7489	>=45	Male	WHOI-WHOII	Dead	6.51781
TCGA-HW-7487	<45	Male	WHOI-WHOII	Alive	10.2274
TCGA-HW-7486	<45	Male	WHOI-WHOII	Alive	2.5726
TCGA-HT-A74O	<45	Male	WHOIII-WHOIV	Alive	2.89863
TCGA-HT-A74L	<45	Female	WHOI-WHOII	Alive	0.19726
TCGA-HT-A74K	>=45	Female	WHOIII-WHOIV	Alive	1.01918
TCGA-HT-A74J	<45	Male	WHOI-WHOII	Alive	4.16164
TCGA-HT-A74H	>=45	Male	WHOIII-WHOIV	Alive	1.72329
TCGA-HT-A61C	>=45	Male	WHOIII-WHOIV	Dead	0.224658
TCGA-HT-A61B	<45	Male	WHOIII-WHOIV	Alive	0.00821918
TCGA-HT-A61A	<45	Female	WHOI-WHOII	Alive	3.18904
TCGA-HT-A619	>=45	Female	WHOIII-WHOIV	Alive	0.567123
TCGA-HT-A618	<45	Female	WHOIII-WHOIV	Alive	7.87671
TCGA-HT-A617	>=45	Male	WHOI-WHOII	Alive	2.6411
TCGA-HT-A616	<45	Female	WHOI-WHOII	Alive	4.52055
TCGA-HT-A615	<45	Female	WHOI-WHOII	Alive	2.51781
TCGA-HT-A614	>=45	Male	WHOI-WHOII	Alive	1.72329
TCGA-HT-A5RC	>=45	Female	WHOIII-WHOIV	Dead	0.443836
TCGA-HT-A5RB	<45	Male	WHOI-WHOII	Alive	1.37534
TCGA-HT-A5RA	>=45	Female	WHOIII-WHOIV	Alive	1.47397
TCGA-HT-A5R9	>=45	Female	WHOIII-WHOIV	Alive	1.30959
TCGA-HT-A5R7	<45	Female	WHOIII-WHOIV	Alive	8.76712
TCGA-HT-A5R5	<45	Female	WHOI-WHOII	Alive	0.0219178
TCGA-HT-A4DV	>=45	Female	WHOIII-WHOIV	Alive	1.79452
TCGA-HT-A4DS	>=45	Female	WHOIII-WHOIV	Alive	7.76712
TCGA-HT-8564	>=45	Male	WHOIII-WHOIV	Alive	2.63562
TCGA-HT-8563	<45	Female	WHOIII-WHOIV	Alive	3.89315
TCGA-HT-8558	<45	Female	WHOI-WHOII	Alive	3.8274
TCGA-HT-8114	<45	Male	WHOIII-WHOIV	Alive	2.6137
TCGA-HT-8113	>=45	Female	WHOI-WHOII	Alive	0.287671
TCGA-HT-8111	<45	Male	WHOIII-WHOIV	Alive	0.00547945
TCGA-HT-8110	>=45	Male	WHOIII-WHOIV	Alive	6.12329
TCGA-HT-8109	>=45	Male	WHOIII-WHOIV	Alive	3.70137
TCGA-HT-8108	<45	Female	WHOI-WHOII	Alive	11.2685
TCGA-HT-8107	>=45	Male	WHOI-WHOII	Alive	0.0109589
TCGA-HT-8105	>=45	Male	WHOIII-WHOIV	Alive	2.84932
TCGA-HT-8104	>=45	Female	WHOIII-WHOIV	Alive	3.2137
TCGA-HT-8019	<45	Female	WHOIII-WHOIV	Alive	0.169863
TCGA-HT-8018	>=45	Female	WHOI-WHOII	Dead	2.48767
TCGA-HT-8015	<45	Male	WHOI-WHOII	Alive	2.27945
TCGA-HT-8013	<45	Female	WHOI-WHOII	Dead	0.736986
TCGA-HT-8012	<45	Female	WHOI-WHOII	Alive	1.26301
TCGA-HT-8011	>=45	Male	WHOIII-WHOIV	Alive	2.76986
TCGA-HT-8010	>=45	Female	WHOI-WHOII	Alive	7.99452
TCGA-HT-7902	<45	Female	WHOI-WHOII	Alive	3.90685
TCGA-HT-7884	>=45	Female	WHOI-WHOII	Alive	2.70411
TCGA-HT-7882	>=45	Male	WHOIII-WHOIV	Dead	0.106849
TCGA-HT-7881	<45	Male	WHOI-WHOII	Alive	1.03562
TCGA-HT-7880	<45	Male	WHOI-WHOII	Alive	0.89863
TCGA-HT-7879	<45	Male	WHOIII-WHOIV	Alive	1.35342
TCGA-HT-7877	<45	Female	WHOI-WHOII	Alive	1.4137
TCGA-HT-7875	>=45	Male	WHOI-WHOII	Alive	1.78356
TCGA-HT-7874	<45	Female	WHOIII-WHOIV	Alive	4.94795
TCGA-HT-7873	<45	Male	WHOI-WHOII	Alive	0.783562
TCGA-HT-7860	>=45	Female	WHOIII-WHOIV	Alive	2.03288
TCGA-HT-7858	<45	Male	WHOI-WHOII	Alive	0.660274
TCGA-HT-7857	<45	Female	WHOIII-WHOIV	Alive	1.55342
TCGA-HT-7856	<45	Male	WHOIII-WHOIV	Alive	3.91233
TCGA-HT-7855	<45	Male	WHOIII-WHOIV	Alive	6.26301
TCGA-HT-7854	>=45	Male	WHOI-WHOII	Alive	0.912329
TCGA-HT-7695	<45	Female	WHOI-WHOII	Alive	3.83288
TCGA-HT-7694	>=45	Male	WHOIII-WHOIV	Alive	2.33973
TCGA-HT-7693	>=45	Female	WHOI-WHOII	Alive	3.98082
TCGA-HT-7692	>=45	Male	WHOI-WHOII	Alive	1.25479
TCGA-HT-7691	<45	Female	WHOI-WHOII	Alive	4.46849
TCGA-HT-7690	<45	Male	WHOIII-WHOIV	Alive	1.5589
TCGA-HT-7689	>=45	Female	WHOI-WHOII	Alive	3.67397
TCGA-HT-7688	>=45	Male	WHOIII-WHOIV	Alive	2.63562
TCGA-HT-7687	>=45	Male	WHOIII-WHOIV	Alive	2.50959
TCGA-HT-7686	<45	Female	WHOIII-WHOIV	Alive	0.0191781
TCGA-HT-7684	>=45	Male	WHOIII-WHOIV	Alive	10.8986
TCGA-HT-7681	<45	Female	WHOI-WHOII	Alive	2.07671
TCGA-HT-7680	<45	Female	WHOI-WHOII	Alive	5.29589
TCGA-HT-7677	>=45	Male	WHOIII-WHOIV	Alive	1.50137
TCGA-HT-7676	<45	Male	WHOI-WHOII	Alive	1.57808
TCGA-HT-7620	<45	Male	WHOIII-WHOIV	Alive	3.06849
TCGA-HT-7616	<45	Male	WHOIII-WHOIV	Alive	2.37808
TCGA-HT-7611	<45	Male	WHOI-WHOII	Alive	1.67397
TCGA-HT-7610	<45	Female	WHOI-WHOII	Alive	7.08219
TCGA-HT-7609	<45	Male	WHOIII-WHOIV	Alive	0.876712
TCGA-HT-7608	>=45	Male	WHOI-WHOII	Alive	0.10137
TCGA-HT-7607	<45	Male	WHOI-WHOII	Alive	0.0630137
TCGA-HT-7606	<45	Female	WHOI-WHOII	Alive	1.96712
TCGA-HT-7605	<45	Male	WHOI-WHOII	Alive	3.01096
TCGA-HT-7604	>=45	Male	WHOI-WHOII	Alive	0.00821918
TCGA-HT-7603	<45	Male	WHOI-WHOII	Alive	1.60274
TCGA-HT-7602	<45	Male	WHOI-WHOII	Alive	1.33151
TCGA-HT-7601	<45	Female	WHOIII-WHOIV	Alive	10.3041
TCGA-HT-7485	<45	Male	WHOI-WHOII	Alive	5.44932
TCGA-HT-7483	<45	Male	WHOI-WHOII	Alive	1.72603
TCGA-HT-7482	<45	Female	WHOI-WHOII	Alive	1.47123
TCGA-HT-7481	<45	Male	WHOI-WHOII	Alive	7.83562
TCGA-HT-7480	<45	Male	WHOI-WHOII	Alive	1.99178
TCGA-HT-7479	<45	Male	WHOIII-WHOIV	Alive	2.19178
TCGA-HT-7478	<45	Male	WHOI-WHOII	Alive	2.23014
TCGA-HT-7477	>=45	Male	WHOIII-WHOIV	Alive	3.42466
TCGA-HT-7476	<45	Male	WHOI-WHOII	Alive	2.61644
TCGA-HT-7475	>=45	Male	WHOIII-WHOIV	Alive	0.169863
TCGA-HT-7474	>=45	Male	WHOI-WHOII	Alive	3.06849
TCGA-HT-7473	<45	Male	WHOI-WHOII	Alive	1.40274
TCGA-HT-7472	<45	Male	WHOI-WHOII	Alive	0.424658
TCGA-HT-7471	<45	Female	WHOIII-WHOIV	Alive	4.25479
TCGA-HT-7470	<45	Male	WHOIII-WHOIV	Dead	0.50411
TCGA-HT-7469	<45	Male	WHOIII-WHOIV	Dead	1.00822
TCGA-HT-7468	<45	Male	WHOIII-WHOIV	Alive	0.30411
TCGA-HT-7467	>=45	Male	WHOI-WHOII	Alive	0.764384
TCGA-FN-7833	<45	Male	WHOIII-WHOIV	Alive	7.40274
TCGA-FG-A87Q	>=45	Female	WHOIII-WHOIV	Alive	2.81096
TCGA-FG-A87N	<45	Female	WHOIII-WHOIV	Alive	1.41096
TCGA-FG-A713	<45	Female	WHOI-WHOII	Dead	1.23014
TCGA-FG-A711	<45	Female	WHOI-WHOII	Dead	1.58356
TCGA-FG-A710	>=45	Female	WHOI-WHOII	Alive	7.0274
TCGA-FG-A70Z	>=45	Female	WHOIII-WHOIV	Alive	2.23014
TCGA-FG-A70Y	<45	Female	WHOI-WHOII	Alive	1.33425
TCGA-FG-A6J3	>=45	Female	WHOIII-WHOIV	Alive	0.531507
TCGA-FG-A6J1	>=45	Female	WHOI-WHOII	Alive	0.682192
TCGA-FG-A6IZ	>=45	Male	WHOI-WHOII	Alive	1.55068
TCGA-FG-A60L	<45	Female	WHOI-WHOII	Alive	0.00821918
TCGA-FG-A60K	<45	Female	WHOI-WHOII	Alive	14.1534
TCGA-FG-A60J	>=45	Female	WHOI-WHOII	Alive	2.71781
TCGA-FG-A4MY	>=45	Female	WHOI-WHOII	Alive	1.19178
TCGA-FG-A4MX	>=45	Male	WHOI-WHOII	Alive	1.56438
TCGA-FG-A4MW	>=45	Male	WHOIII-WHOIV	Dead	1.32055
TCGA-FG-A4MU	>=45	Male	WHOIII-WHOIV	Alive	0.367123
TCGA-FG-A4MT	<45	Female	WHOI-WHOII	Alive	0.00821918
TCGA-FG-8191	<45	Male	WHOIII-WHOIV	Alive	2.04932
TCGA-FG-8189	<45	Female	WHOI-WHOII	Alive	2.71781
TCGA-FG-8188	<45	Male	WHOI-WHOII	Alive	2.65205
TCGA-FG-8187	<45	Male	WHOI-WHOII	Alive	6.66575
TCGA-FG-8186	<45	Female	WHOIII-WHOIV	Alive	0.575342
TCGA-FG-8185	<45	Male	WHOIII-WHOIV	Alive	0.0191781
TCGA-FG-8182	<45	Male	WHOI-WHOII	Alive	1.56986
TCGA-FG-8181	<45	Male	WHOIII-WHOIV	Alive	2.29315
TCGA-FG-7643	>=45	Female	WHOI-WHOII	Alive	0.663014
TCGA-FG-7641	<45	Male	WHOI-WHOII	Alive	3.50411
TCGA-FG-7638	<45	Female	WHOIII-WHOIV	Alive	3.70959
TCGA-FG-7637	>=45	Male	WHOI-WHOII	Alive	1.68493
TCGA-FG-7636	>=45	Male	WHOIII-WHOIV	Alive	1.87671
TCGA-FG-7634	<45	Male	WHOI-WHOII	Alive	1.66301
TCGA-FG-6692	>=45	Male	WHOIII-WHOIV	Dead	1.24384
TCGA-FG-6691	<45	Female	WHOI-WHOII	Alive	0.0191781
TCGA-FG-6690	<45	Male	WHOI-WHOII	Dead	0.561644
TCGA-FG-6689	<45	Male	WHOI-WHOII	Alive	0.443836
TCGA-FG-6688	>=45	Female	WHOIII-WHOIV	Alive	2.15616
TCGA-FG-5965	>=45	Female	WHOI-WHOII	Dead	2.36164
TCGA-FG-5964	>=45	Male	WHOI-WHOII	Alive	2.94795
TCGA-FG-5963	<45	Male	WHOIII-WHOIV	Dead	1.49041
TCGA-FG-5962	>=45	Male	WHOIII-WHOIV	Alive	5.02466
TCGA-F6-A8O4	>=45	Male	WHOI-WHOII	Alive	2.4274
TCGA-F6-A8O3	<45	Male	WHOI-WHOII	Alive	7.28767
TCGA-EZ-7264	>=45	Female	WHOI-WHOII	Alive	1.43014
TCGA-E1-A7Z6	>=45	Female	WHOI-WHOII	Dead	1.59452
TCGA-E1-A7Z4	<45	Male	WHOI-WHOII	Dead	3.26301
TCGA-E1-A7Z3	<45	Female	WHOI-WHOII	Dead	0.750685
TCGA-E1-A7Z2	<45	Male	WHOI-WHOII	Alive	2.46575
TCGA-E1-A7YY	<45	Female	WHOI-WHOII	Dead	0.893151
TCGA-E1-A7YW	<45	Male	WHOI-WHOII	Dead	1.78082
TCGA-E1-A7YV	<45	Female	WHOIII-WHOIV	Dead	1.1863
TCGA-E1-A7YU	<45	Male	WHOIII-WHOIV	Dead	6.52329
TCGA-E1-A7YS	>=45	Male	WHOIII-WHOIV	Dead	3.8
TCGA-E1-A7YQ	>=45	Female	WHOIII-WHOIV	Dead	0.246575
TCGA-E1-A7YO	>=45	Male	WHOIII-WHOIV	Dead	2.28767
TCGA-E1-A7YN	>=45	Female	WHOIII-WHOIV	Dead	1.93151
TCGA-E1-A7YM	>=45	Male	WHOIII-WHOIV	Dead	4.8274
TCGA-E1-A7YL	>=45	Male	WHOIII-WHOIV	Dead	2.92877
TCGA-E1-A7YK	>=45	Male	WHOIII-WHOIV	Dead	2.7726
TCGA-E1-A7YJ	>=45	Male	WHOIII-WHOIV	Dead	0.865753
TCGA-E1-A7YI	<45	Female	WHOIII-WHOIV	Dead	3.66849
TCGA-E1-A7YH	>=45	Female	WHOIII-WHOIV	Dead	7.59452
TCGA-E1-A7YE	<45	Female	WHOIII-WHOIV	Dead	0.663014
TCGA-E1-A7YD	>=45	Male	WHOIII-WHOIV	Dead	1.14247
TCGA-E1-5322	<45	Female	WHOI-WHOII	Dead	7.99452
TCGA-E1-5319	<45	Male	WHOI-WHOII	Alive	12.1781
TCGA-E1-5318	>=45	Female	WHOI-WHOII	Dead	7.56438
TCGA-E1-5311	<45	Male	WHOIII-WHOIV	Dead	1.45205
TCGA-E1-5307	>=45	Female	WHOIII-WHOIV	Dead	1.6411
TCGA-E1-5305	<45	Male	WHOIII-WHOIV	Dead	0.20274
TCGA-E1-5304	<45	Male	WHOIII-WHOIV	Dead	2.50411
TCGA-E1-5303	<45	Male	WHOIII-WHOIV	Dead	0.0191781
TCGA-E1-5302	<45	Male	WHOIII-WHOIV	Dead	0.00821918
TCGA-DU-A7TJ	>=45	Male	WHOIII-WHOIV	Alive	1.08219
TCGA-DU-A7TI	<45	Male	WHOIII-WHOIV	Dead	3.05753
TCGA-DU-A7TG	>=45	Male	WHOI-WHOII	Dead	1.23562
TCGA-DU-A7TD	>=45	Male	WHOIII-WHOIV	Dead	17.5973
TCGA-DU-A7TC	<45	Male	WHOI-WHOII	Alive	3.29041
TCGA-DU-A7TB	>=45	Male	WHOI-WHOII	Alive	1.36986
TCGA-DU-A7TA	<45	Male	WHOI-WHOII	Alive	1.97808
TCGA-DU-A7T8	<45	Male	WHOIII-WHOIV	Dead	2.55616
TCGA-DU-A7T6	>=45	Male	WHOIII-WHOIV	Dead	3.11507
TCGA-DU-A76R	>=45	Male	WHOIII-WHOIV	Dead	1.13425
TCGA-DU-A76O	<45	Male	WHOI-WHOII	Alive	0.0383562
TCGA-DU-A76L	>=45	Male	WHOIII-WHOIV	Dead	5.47945
TCGA-DU-A76K	<45	Female	WHOIII-WHOIV	Alive	1.27671
TCGA-DU-A6S8	<45	Female	WHOIII-WHOIV	Dead	1.74795
TCGA-DU-A6S7	<45	Female	WHOIII-WHOIV	Alive	2.31781
TCGA-DU-A6S6	<45	Female	WHOI-WHOII	Alive	2.11507
TCGA-DU-A6S3	>=45	Male	WHOI-WHOII	Alive	3.12055
TCGA-DU-A6S2	<45	Female	WHOI-WHOII	Alive	3.31233
TCGA-DU-A5TY	>=45	Female	WHOIII-WHOIV	Dead	5.69315
TCGA-DU-A5TW	<45	Female	WHOIII-WHOIV	Alive	2.01644
TCGA-DU-A5TU	>=45	Female	WHOI-WHOII	Alive	1.21644
TCGA-DU-A5TT	>=45	Male	WHOIII-WHOIV	Alive	1.93425
TCGA-DU-A5TS	<45	Male	WHOI-WHOII	Alive	0.263014
TCGA-DU-A5TR	>=45	Male	WHOI-WHOII	Alive	0.487671
TCGA-DU-A5TP	<45	Male	WHOIII-WHOIV	Alive	1.33425
TCGA-DU-8168	>=45	Female	WHOIII-WHOIV	Alive	0.961644
TCGA-DU-8167	<45	Female	WHOI-WHOII	Dead	4.09315
TCGA-DU-8166	<45	Female	WHOI-WHOII	Alive	2.33973
TCGA-DU-8165	>=45	Female	WHOIII-WHOIV	Alive	2.08219
TCGA-DU-8164	>=45	Male	WHOI-WHOII	Alive	0.0630137
TCGA-DU-8163	<45	Male	WHOIII-WHOIV	Alive	1.71781
TCGA-DU-8162	>=45	Female	WHOIII-WHOIV	Dead	1.1726
TCGA-DU-8161	>=45	Female	WHOIII-WHOIV	Dead	7.86027
TCGA-DU-8158	>=45	Female	WHOIII-WHOIV	Dead	10.2055
TCGA-DU-7309	<45	Female	WHOIII-WHOIV	Alive	5.18082
TCGA-DU-7306	<45	Male	WHOI-WHOII	Dead	0.630137
TCGA-DU-7304	<45	Male	WHOIII-WHOIV	Dead	3.25753
TCGA-DU-7302	>=45	Female	WHOIII-WHOIV	Alive	7.26027
TCGA-DU-7301	>=45	Male	WHOI-WHOII	Dead	4.71507
TCGA-DU-7300	>=45	Female	WHOIII-WHOIV	Dead	2.69589
TCGA-DU-7299	<45	Male	WHOIII-WHOIV	Dead	0.0465753
TCGA-DU-7298	<45	Female	WHOIII-WHOIV	Dead	0.419178
TCGA-DU-7294	>=45	Female	WHOI-WHOII	Alive	1.56438
TCGA-DU-7292	>=45	Male	WHOIII-WHOIV	Dead	1.4411
TCGA-DU-7290	>=45	Female	WHOIII-WHOIV	Dead	0.210959
TCGA-DU-7018	>=45	Female	WHOIII-WHOIV	Dead	0.920548
TCGA-DU-7015	<45	Female	WHOI-WHOII	Alive	1.36164
TCGA-DU-7014	<45	Female	WHOIII-WHOIV	Alive	2.20548
TCGA-DU-7013	>=45	Male	WHOIII-WHOIV	Dead	0.208219
TCGA-DU-7012	<45	Male	WHOIII-WHOIV	Alive	0.936986
TCGA-DU-7011	<45	Male	WHOI-WHOII	Dead	4.67397
TCGA-DU-7010	>=45	Female	WHOIII-WHOIV	Dead	1.40274
TCGA-DU-7009	<45	Female	WHOI-WHOII	Dead	4.92055
TCGA-DU-7008	<45	Female	WHOI-WHOII	Alive	0.00821918
TCGA-DU-7007	<45	Male	WHOI-WHOII	Dead	0.641096
TCGA-DU-7006	>=45	Female	WHOIII-WHOIV	Dead	4.0274
TCGA-DU-6410	>=45	Male	WHOIII-WHOIV	Alive	1.70411
TCGA-DU-6408	<45	Female	WHOIII-WHOIV	Dead	2.43562
TCGA-DU-6407	<45	Female	WHOI-WHOII	Dead	0.0136986
TCGA-DU-6406	>=45	Female	WHOIII-WHOIV	Dead	1.97534
TCGA-DU-6405	>=45	Female	WHOIII-WHOIV	Dead	1.78356
TCGA-DU-6404	<45	Female	WHOIII-WHOIV	Dead	1.61096
TCGA-DU-6403	>=45	Female	WHOIII-WHOIV	Dead	0.380822
TCGA-DU-6402	>=45	Male	WHOIII-WHOIV	Dead	1.11507
TCGA-DU-6401	<45	Female	WHOI-WHOII	Dead	4.8
TCGA-DU-6400	<45	Male	WHOI-WHOII	Alive	3.56164
TCGA-DU-6399	>=45	Male	WHOI-WHOII	Dead	0.00821918
TCGA-DU-6397	>=45	Male	WHOIII-WHOIV	Dead	1.83836
TCGA-DU-6396	<45	Female	WHOIII-WHOIV	Dead	6.07945
TCGA-DU-6395	<45	Male	WHOI-WHOII	Dead	1.49863
TCGA-DU-6394	>=45	Male	WHOIII-WHOIV	Dead	0.545205
TCGA-DU-6393	>=45	Male	WHOIII-WHOIV	Dead	3.33425
TCGA-DU-6392	<45	Female	WHOIII-WHOIV	Alive	1.24384
TCGA-DU-5874	>=45	Female	WHOI-WHOII	Alive	0.956164
TCGA-DU-5872	>=45	Female	WHOI-WHOII	Alive	4.32329
TCGA-DU-5871	<45	Female	WHOI-WHOII	Alive	12.863
TCGA-DU-5870	<45	Female	WHOI-WHOII	Alive	0.334247
TCGA-DU-5855	>=45	Female	WHOIII-WHOIV	Alive	0.624658
TCGA-DU-5854	>=45	Female	WHOIII-WHOIV	Alive	4.02466
TCGA-DU-5853	<45	Male	WHOI-WHOII	Alive	1.66849
TCGA-DU-5852	>=45	Female	WHOIII-WHOIV	Dead	1.5589
TCGA-DU-5849	>=45	Male	WHOI-WHOII	Alive	5.7726
TCGA-DU-5847	<45	Female	WHOIII-WHOIV	Alive	3.33973
TCGA-DH-A7UV	>=45	Male	WHOIII-WHOIV	Alive	1.73425
TCGA-DH-A7UU	<45	Male	WHOIII-WHOIV	Alive	12.0877
TCGA-DH-A7UT	<45	Male	WHOIII-WHOIV	Dead	1.2
TCGA-DH-A7US	>=45	Male	WHOI-WHOII	Alive	9.79178
TCGA-DH-A7UR	>=45	Female	WHOIII-WHOIV	Alive	3.56438
TCGA-DH-A66G	>=45	Female	WHOIII-WHOIV	Alive	2.02192
TCGA-DH-A66F	>=45	Male	WHOI-WHOII	Alive	1.53151
TCGA-DH-A66D	<45	Female	WHOIII-WHOIV	Alive	2.53699
TCGA-DH-A66B	>=45	Male	WHOIII-WHOIV	Alive	3.29041
TCGA-DH-A669	>=45	Male	WHOIII-WHOIV	Dead	2.24932
TCGA-DH-5144	>=45	Female	WHOIII-WHOIV	Alive	2.07671
TCGA-DH-5143	<45	Male	WHOIII-WHOIV	Alive	14.3973
TCGA-DH-5142	<45	Male	WHOIII-WHOIV	Alive	3.54521
TCGA-DH-5141	<45	Male	WHOIII-WHOIV	Alive	0.2
TCGA-DH-5140	<45	Female	WHOIII-WHOIV	Dead	0.950685
TCGA-DB-A75P	<45	Female	WHOI-WHOII	Alive	0.19726
TCGA-DB-A75O	<45	Male	WHOIII-WHOIV	Alive	0.939726
TCGA-DB-A75M	>=45	Male	WHOI-WHOII	Alive	2.83014
TCGA-DB-A75L	<45	Female	WHOIII-WHOIV	Alive	2.36438
TCGA-DB-A75K	>=45	Female	WHOIII-WHOIV	Alive	3.44384
TCGA-DB-A64X	>=45	Female	WHOIII-WHOIV	Alive	3.6
TCGA-DB-A64W	>=45	Female	WHOIII-WHOIV	Dead	0.0109589
TCGA-DB-A64V	>=45	Male	WHOI-WHOII	Alive	2.63288
TCGA-DB-A64U	<45	Female	WHOI-WHOII	Alive	1.34795
TCGA-DB-A64S	<45	Male	WHOI-WHOII	Alive	3.61644
TCGA-DB-A64R	<45	Female	WHOI-WHOII	Alive	2.51781
TCGA-DB-A64Q	<45	Female	WHOI-WHOII	Alive	3.41096
TCGA-DB-A64P	<45	Male	WHOIII-WHOIV	Alive	1.21096
TCGA-DB-A64O	<45	Female	WHOIII-WHOIV	Alive	3.34795
TCGA-DB-A64L	<45	Female	WHOI-WHOII	Dead	3.45753
TCGA-DB-A4XH	>=45	Female	WHOI-WHOII	Alive	0.868493
TCGA-DB-A4XG	<45	Male	WHOIII-WHOIV	Alive	0.665753
TCGA-DB-A4XF	<45	Female	WHOIII-WHOIV	Alive	0.191781
TCGA-DB-A4XE	<45	Female	WHOIII-WHOIV	Alive	5.16712
TCGA-DB-A4XD	<45	Male	WHOIII-WHOIV	Alive	0.454795
TCGA-DB-A4XC	<45	Male	WHOI-WHOII	Alive	8.21918
TCGA-DB-A4XB	<45	Male	WHOIII-WHOIV	Alive	1.95616
TCGA-DB-A4XA	<45	Male	WHOI-WHOII	Alive	6.25205
TCGA-DB-A4X9	<45	Female	WHOI-WHOII	Alive	2.24384
TCGA-DB-5281	>=45	Male	WHOIII-WHOIV	Alive	1.85479
TCGA-DB-5280	>=45	Male	WHOI-WHOII	Alive	0.671233
TCGA-DB-5279	>=45	Male	WHOI-WHOII	Alive	1.16986
TCGA-DB-5278	<45	Male	WHOI-WHOII	Alive	0.158904
TCGA-DB-5277	<45	Male	WHOIII-WHOIV	Dead	3.11507
TCGA-DB-5275	<45	Male	WHOIII-WHOIV	Alive	3.32329
TCGA-DB-5274	<45	Female	WHOIII-WHOIV	Alive	1.18904
TCGA-DB-5273	<45	Male	WHOIII-WHOIV	Alive	0.150685
TCGA-DB-5270	<45	Female	WHOIII-WHOIV	Alive	1.29041
TCGA-CS-6670	<45	Male	WHOIII-WHOIV	Alive	0.463014
TCGA-CS-6669	<45	Female	WHOI-WHOII	Alive	0.531507
TCGA-CS-6668	>=45	Female	WHOI-WHOII	Alive	1.09041
TCGA-CS-6667	<45	Female	WHOI-WHOII	Alive	0.0191781
TCGA-CS-6666	<45	Male	WHOIII-WHOIV	Alive	3.54521
TCGA-CS-6290	<45	Male	WHOIII-WHOIV	Dead	2.26301
TCGA-CS-6188	>=45	Male	WHOIII-WHOIV	Dead	5.32329
TCGA-CS-6186	>=45	Male	WHOIII-WHOIV	Dead	1.6
TCGA-CS-5397	>=45	Female	WHOIII-WHOIV	Dead	2.12877
TCGA-CS-5396	>=45	Female	WHOIII-WHOIV	Alive	0.0164384
TCGA-CS-5395	>=45	Male	WHOI-WHOII	Dead	4.08493
TCGA-CS-5394	<45	Male	WHOIII-WHOIV	Alive	1.62192
TCGA-CS-5393	<45	Male	WHOIII-WHOIV	Alive	1.2
TCGA-CS-4944	>=45	Male	WHOI-WHOII	Alive	2.6
TCGA-CS-4943	<45	Male	WHOIII-WHOIV	Dead	1.45753
TCGA-CS-4942	>=45	Female	WHOIII-WHOIV	Dead	13.0192
TCGA-CS-4941	>=45	Male	WHOIII-WHOIV	Dead	1.85753
TCGA-CS-4938	<45	Female	WHOI-WHOII	Alive	0.0191781
TCGA-76-4932	>=45	Female	WHOIII-WHOIV	Dead	0.608219
TCGA-76-4931	>=45	Male	WHOIII-WHOIV	Alive	0.764384
TCGA-76-4929	>=45	Female	WHOIII-WHOIV	Alive	0.30411
TCGA-76-4928	<45	Female	WHOI-WHOII	Alive	0.257534
TCGA-76-4927	>=45	Female	WHOIII-WHOIV	Dead	0.986301
TCGA-76-4926	>=45	Female	WHOIII-WHOIV	Dead	2.60548
TCGA-76-4925	>=45	Male	WHOIII-WHOIV	Dead	1.07945
TCGA-41-5651	>=45	Female	WHOIII-WHOIV	Dead	0.39726
TCGA-41-4097	>=45	Female	WHOIII-WHOIV	Dead	0.0164384
TCGA-41-3915	>=45	Female	WHOIII-WHOIV	Dead	0.986301
TCGA-41-2572	>=45	Male	WHOIII-WHOIV	Alive	1.11233
TCGA-41-2571	<45	Female	WHOI-WHOII	Alive	0.0712329
TCGA-32-5222	>=45	Female	WHOIII-WHOIV	Dead	1.60274
TCGA-32-4213	>=45	Male	WHOIII-WHOIV	Dead	1.65479
TCGA-32-2638	>=45	Female	WHOIII-WHOIV	Dead	0.912329
TCGA-32-2634	<45	Female	WHOI-WHOII	Alive	1.89863
TCGA-32-2632	>=45	Male	WHOIII-WHOIV	Dead	0.736986
TCGA-32-2616	>=45	Female	WHOIII-WHOIV	Dead	0.613699
TCGA-32-2615	>=45	Male	WHOIII-WHOIV	Dead	1.32877
TCGA-32-1982	>=45	Male	WHOIII-WHOIV	Alive	0.389041
TCGA-32-1980	>=45	Male	WHOIII-WHOIV	Dead	0.0986301
TCGA-32-1970	>=45	Male	WHOIII-WHOIV	Dead	1.2274
TCGA-28-5220	>=45	Female	WHOIII-WHOIV	Dead	1.06301
TCGA-28-5218	>=45	Male	WHOIII-WHOIV	Alive	0.479452
TCGA-28-5216	>=45	Male	WHOIII-WHOIV	Dead	1.77534
TCGA-28-5215	>=45	Female	WHOIII-WHOIV	Dead	1.28219
TCGA-28-5209	>=45	Male	WHOIII-WHOIV	Dead	1.50685
TCGA-28-5208	>=45	Female	WHOIII-WHOIV	Alive	2.11233
TCGA-28-5207	>=45	Male	WHOIII-WHOIV	Dead	0.939726
TCGA-28-5204	>=45	Male	WHOIII-WHOIV	Dead	1.24384
TCGA-28-2514	>=45	Male	WHOIII-WHOIV	Dead	0.438356
TCGA-28-2513	>=45	Female	WHOIII-WHOIV	Dead	1.26027
TCGA-28-2509	>=45	Female	WHOIII-WHOIV	Dead	0.978082
TCGA-28-1753	>=45	Female	WHOIII-WHOIV	Dead	0.10137
TCGA-28-1747	>=45	Male	WHOIII-WHOIV	Dead	0.210959
TCGA-27-2528	>=45	Male	WHOIII-WHOIV	Dead	1.18356
TCGA-27-2526	>=45	Male	WHOIII-WHOIV	Dead	0.238356
TCGA-27-2524	>=45	Male	WHOIII-WHOIV	Alive	0.457534
TCGA-27-2523	>=45	Female	WHOIII-WHOIV	Dead	1.33973
TCGA-27-2521	>=45	Female	WHOIII-WHOIV	Alive	1.24658
TCGA-27-2519	>=45	Male	WHOIII-WHOIV	Alive	0.69589
TCGA-27-1837	>=45	Female	WHOIII-WHOIV	Dead	1.04658
TCGA-27-1835	>=45	Female	WHOIII-WHOIV	Alive	0.868493
TCGA-27-1834	>=45	Female	WHOIII-WHOIV	Dead	0.268493
TCGA-27-1832	>=45	Male	WHOIII-WHOIV	Alive	0.0767123
TCGA-27-1831	>=45	Female	WHOIII-WHOIV	Alive	1.50137
TCGA-27-1830	>=45	Male	WHOIII-WHOIV	Dead	0.421918
TCGA-26-5139	>=45	Male	WHOIII-WHOIV	Dead	0.131507
TCGA-26-5136	>=45	Male	WHOIII-WHOIV	Dead	1.13425
TCGA-26-5135	>=45	Female	WHOIII-WHOIV	Dead	0.739726
TCGA-26-5134	>=45	Male	WHOIII-WHOIV	Dead	2.90959
TCGA-26-5133	>=45	Male	WHOIII-WHOIV	Alive	1.23836
TCGA-26-5132	>=45	Male	WHOIII-WHOIV	Dead	0.783562
TCGA-26-1442	>=45	Male	WHOIII-WHOIV	Alive	2.61096
TCGA-19-5960	>=45	Male	WHOIII-WHOIV	Dead	1.49041
TCGA-19-4065	>=45	Female	WHOIII-WHOIV	Dead	0.586301
TCGA-19-2629	>=45	Male	WHOIII-WHOIV	Dead	1.10959
TCGA-19-2625	>=45	Male	WHOIII-WHOIV	Dead	2.01918
TCGA-19-2624	>=45	Male	WHOIII-WHOIV	Dead	0.0136986
TCGA-19-2620	>=45	Male	WHOIII-WHOIV	Dead	0.405479
TCGA-19-2619	>=45	Male	WHOIII-WHOIV	Dead	0.805479
TCGA-19-1787	>=45	Male	WHOIII-WHOIV	Alive	1.05479
TCGA-19-1390	>=45	Female	WHOIII-WHOIV	Dead	2.11507
TCGA-19-1389	>=45	Male	WHOIII-WHOIV	Dead	1.38356
TCGA-19-0957	>=45	Female	WHOIII-WHOIV	Dead	4.21096
TCGA-16-1045	>=45	Male	WHOIII-WHOIV	Dead	2.41918
TCGA-16-0846	<45	Female	WHOI-WHOII	Alive	0.326027
TCGA-15-1444	>=45	Male	WHOIII-WHOIV	Dead	1.69315
TCGA-15-0742	>=45	Male	WHOIII-WHOIV	Dead	1.14795
TCGA-14-2554	>=45	Male	WHOIII-WHOIV	Dead	1.45753
TCGA-14-1829	>=45	Male	WHOIII-WHOIV	Dead	0.59726
TCGA-14-1825	>=45	Male	WHOIII-WHOIV	Dead	0.635616
TCGA-14-1823	>=45	Female	WHOIII-WHOIV	Dead	1.48767
TCGA-14-1402	>=45	Female	WHOIII-WHOIV	Dead	2.67123
TCGA-14-1034	>=45	Male	WHOIII-WHOIV	Dead	1.32877
TCGA-14-0871	>=45	Female	WHOIII-WHOIV	Dead	2.41096
TCGA-14-0817	>=45	Female	WHOIII-WHOIV	Dead	0.449315
TCGA-14-0790	>=45	Male	WHOIII-WHOIV	Dead	1.14795
TCGA-14-0789	>=45	Male	WHOIII-WHOIV	Dead	0.936986
TCGA-14-0787	>=45	Female	WHOIII-WHOIV	Dead	1.09315
TCGA-14-0781	>=45	Male	WHOIII-WHOIV	Dead	0.0794521
TCGA-14-0736	>=45	Male	WHOIII-WHOIV	Dead	3.37808
TCGA-12-5299	>=45	Female	WHOIII-WHOIV	Dead	0.734247
TCGA-12-5295	>=45	Male	WHOIII-WHOIV	Dead	1.24384
TCGA-12-3653	>=45	Male	WHOIII-WHOIV	Dead	0.512329
TCGA-12-3652	>=45	Female	WHOIII-WHOIV	Dead	2.09863
TCGA-12-3650	>=45	Male	WHOIII-WHOIV	Dead	1.21096
TCGA-12-1597	>=45	Female	WHOIII-WHOIV	Dead	1.84932
TCGA-12-0821	>=45	Female	WHOIII-WHOIV	Dead	0.884932
TCGA-12-0619	>=45	Male	WHOIII-WHOIV	Dead	2.90959
TCGA-12-0618	>=45	Female	WHOIII-WHOIV	Dead	1.08219
TCGA-12-0616	>=45	Female	WHOIII-WHOIV	Dead	1.82466
TCGA-08-0386	>=45	Male	WHOIII-WHOIV	Dead	2.2
TCGA-06-5859	>=45	Female	WHOIII-WHOIV	Dead	0.380822
TCGA-06-5858	>=45	Male	WHOIII-WHOIV	Dead	1.46575
TCGA-06-5856	>=45	Female	WHOIII-WHOIV	Dead	0.632877
TCGA-06-5418	>=45	Female	WHOIII-WHOIV	Alive	0.4
TCGA-06-5417	>=45	Male	WHOIII-WHOIV	Dead	0.424658
TCGA-06-5416	>=45	Male	WHOIII-WHOIV	Dead	1.65205
TCGA-06-5414	>=45	Female	WHOIII-WHOIV	Dead	0.747945
TCGA-06-5413	>=45	Female	WHOIII-WHOIV	Dead	0.339726
TCGA-06-5412	>=45	Female	WHOIII-WHOIV	Dead	0.378082
TCGA-06-5411	>=45	Male	WHOIII-WHOIV	Dead	1.13699
TCGA-06-5410	>=45	Male	WHOIII-WHOIV	Dead	0.29589
TCGA-06-5408	>=45	Female	WHOIII-WHOIV	Dead	0.917808
TCGA-06-2570	>=45	Male	WHOIII-WHOIV	Dead	2.62466
TCGA-06-2569	>=45	Male	WHOIII-WHOIV	Dead	0.0356164
TCGA-06-2567	>=45	Male	WHOIII-WHOIV	Dead	0.260274
TCGA-06-2565	>=45	Male	WHOIII-WHOIV	Dead	1.3863
TCGA-06-2564	>=45	Male	WHOIII-WHOIV	Alive	0.49589
TCGA-06-2563	>=45	Female	WHOIII-WHOIV	Dead	2.55342
TCGA-06-2562	>=45	Male	WHOIII-WHOIV	Dead	1.27671
TCGA-06-2561	>=45	Female	WHOIII-WHOIV	Dead	1.47123
TCGA-06-2559	<45	Female	WHOI-WHOII	Alive	1.16986
TCGA-06-2558	>=45	Female	WHOIII-WHOIV	Dead	1.0411
TCGA-06-2557	>=45	Male	WHOIII-WHOIV	Dead	7.34521
TCGA-06-1804	>=45	Male	WHOIII-WHOIV	Dead	0.312329
TCGA-06-0882	>=45	Male	WHOIII-WHOIV	Dead	0.268493
TCGA-06-0878	>=45	Male	WHOIII-WHOIV	Alive	0.59726
TCGA-06-0750	>=45	Male	WHOIII-WHOIV	Dead	0.060274
TCGA-06-0749	>=45	Male	WHOIII-WHOIV	Alive	3.99452
TCGA-06-0747	>=45	Female	WHOIII-WHOIV	Dead	0.224658
TCGA-06-0745	>=45	Male	WHOIII-WHOIV	Dead	0.654795
TCGA-06-0744	>=45	Female	WHOIII-WHOIV	Alive	5.82466
TCGA-06-0743	>=45	Female	WHOIII-WHOIV	Dead	1.39726
TCGA-06-0686	>=45	Female	WHOIII-WHOIV	Dead	0.364384
TCGA-06-0649	>=45	Female	WHOIII-WHOIV	Dead	0.175342
TCGA-06-0646	>=45	Female	WHOIII-WHOIV	Dead	1.58082
TCGA-06-0645	>=45	Female	WHOIII-WHOIV	Alive	0.479452
TCGA-06-0644	>=45	Male	WHOIII-WHOIV	Dead	1.05205
TCGA-06-0238	>=45	Male	WHOIII-WHOIV	Dead	0.558904
TCGA-06-0221	>=45	Male	WHOIII-WHOIV	Dead	0.410959
TCGA-06-0219	>=45	Male	WHOIII-WHOIV	Dead	1.21096
TCGA-06-0211	>=45	Male	WHOIII-WHOIV	Dead	0.090411
TCGA-06-0210	>=45	Male	WHOIII-WHOIV	Dead	0.616438
TCGA-06-0190	>=45	Male	WHOIII-WHOIV	Dead	0.227397
TCGA-06-0187	>=45	Female	WHOIII-WHOIV	Dead	2.26849
TCGA-06-0184	>=45	Male	WHOIII-WHOIV	Alive	1.31507
TCGA-06-0178	>=45	Female	WHOIII-WHOIV	Dead	0.186301
TCGA-06-0174	>=45	Female	WHOIII-WHOIV	Dead	0.821918
TCGA-06-0171	>=45	Male	WHOIII-WHOIV	Dead	3.90685
TCGA-06-0168	>=45	Male	WHOIII-WHOIV	Alive	1.63836
TCGA-06-0158	>=45	Female	WHOIII-WHOIV	Dead	0.90137
TCGA-06-0157	>=45	Female	WHOIII-WHOIV	Dead	0.265753
TCGA-06-0156	>=45	Male	WHOIII-WHOIV	Dead	0.487671
TCGA-06-0152	>=45	Male	WHOIII-WHOIV	Dead	1.0274
TCGA-06-0141	>=45	Male	WHOIII-WHOIV	Dead	0.857534
TCGA-06-0139	>=45	Female	WHOIII-WHOIV	Dead	0.224658
TCGA-06-0138	>=45	Male	WHOIII-WHOIV	Dead	2.01918
TCGA-06-0132	>=45	Male	WHOIII-WHOIV	Dead	1.26027
TCGA-06-0130	>=45	Male	WHOIII-WHOIV	Dead	1.73151
TCGA-06-0129	>=45	Male	WHOIII-WHOIV	Dead	2.80548
TCGA-06-0125	>=45	Female	WHOIII-WHOIV	Dead	3.96712
TCGA-02-2486	>=45	Male	WHOIII-WHOIV	Dead	0.378082
TCGA-02-2485	>=45	Female	WHOIII-WHOIV	Dead	1.28767
TCGA-02-2483	>=45	Male	WHOIII-WHOIV	Dead	0.430137
TCGA-02-0055	>=45	Female	WHOIII-WHOIV	Dead	0.208219
TCGA-02-0047	>=45	Male	WHOIII-WHOIV	Dead	1.2274
CGGA_J130	<45	Male	WHOI-WHOII	Alive	8.53699
CGGA_J042	<45	Male	WHOI-WHOII	Dead	3.86027
CGGA_J030	<45	Male	WHOI-WHOII	Alive	9.28493
CGGA_J024	<45	Female	WHOI-WHOII	Alive	9.34247
CGGA_J023	<45	Male	WHOIII-WHOIV	Dead	2.81644
CGGA_D58	<45	Male	WHOIII-WHOIV	Dead	0.49589
CGGA_D57	<45	Male	WHOIII-WHOIV	Dead	2.09863
CGGA_D56	>=45	Male	WHOIII-WHOIV	Dead	0.175342
CGGA_D52	>=45	Male	WHOIII-WHOIV	Alive	9.66849
CGGA_D51	>=45	Female	WHOIII-WHOIV	Dead	0.369863
CGGA_D48	<45	Female	WHOIII-WHOIV	Dead	0.605479
CGGA_D47	<45	Male	WHOI-WHOII	Dead	2.87123
CGGA_D46	<45	Female	WHOIII-WHOIV	Dead	0.821918
CGGA_D45	<45	Male	WHOIII-WHOIV	Alive	2.34521
CGGA_D44	<45	Female	WHOIII-WHOIV	Dead	0.857534
CGGA_D40	<45	Male	WHOI-WHOII	Alive	9.74521
CGGA_D38	<45	Female	WHOIII-WHOIV	Dead	1.88767
CGGA_D37	>=45	Male	WHOIII-WHOIV	Dead	2.64384
CGGA_D36	>=45	Male	WHOIII-WHOIV	Dead	0.0931507
CGGA_D35	>=45	Female	WHOIII-WHOIV	Dead	1.81096
CGGA_D34	>=45	Male	WHOIII-WHOIV	Dead	0.40274
CGGA_D33	<45	Male	WHOIII-WHOIV	Dead	0.317808
CGGA_D32	>=45	Male	WHOIII-WHOIV	Dead	0.980822
CGGA_D30	>=45	Male	WHOIII-WHOIV	Dead	0.589041
CGGA_D29	<45	Male	WHOI-WHOII	Alive	9.98082
CGGA_D27	<45	Male	WHOIII-WHOIV	Alive	10
CGGA_D26	>=45	Male	WHOIII-WHOIV	Dead	0.720548
CGGA_D24	<45	Female	WHOIII-WHOIV	Dead	2.29315
CGGA_D21	<45	Female	WHOIII-WHOIV	Dead	3.30959
CGGA_D20	<45	Female	WHOI-WHOII	Dead	6.48493
CGGA_D16	>=45	Female	WHOIII-WHOIV	Dead	0.715068
CGGA_D15	<45	Female	WHOI-WHOII	Alive	10.0521
CGGA_D11	>=45	Female	WHOIII-WHOIV	Dead	2.26575
CGGA_D09	>=45	Male	WHOIII-WHOIV	Dead	0.638356
CGGA_D07	<45	Male	WHOI-WHOII	Alive	10.1123
CGGA_D04	<45	Male	WHOI-WHOII	Alive	10.1288
CGGA_D03	<45	Male	WHOIII-WHOIV	Dead	1.1589
CGGA_D02	<45	Male	WHOIII-WHOIV	Dead	1.32603
CGGA_909	<45	Female	WHOI-WHOII	Alive	10.7397
CGGA_908	<45	Male	WHOI-WHOII	Dead	6.67397
CGGA_905	>=45	Male	WHOI-WHOII	Dead	8.69589
CGGA_904	<45	Male	WHOI-WHOII	Dead	2.12055
CGGA_902	>=45	Male	WHOIII-WHOIV	Dead	0.528767
CGGA_899	>=45	Male	WHOIII-WHOIV	Dead	0.632877
CGGA_898	<45	Male	WHOI-WHOII	Dead	4.55616
CGGA_893	<45	Female	WHOI-WHOII	Dead	8.65753
CGGA_892	<45	Male	WHOI-WHOII	Alive	1.2274
CGGA_884	>=45	Female	WHOI-WHOII	Dead	3.09863
CGGA_878	<45	Male	WHOIII-WHOIV	Dead	2.36438
CGGA_876	>=45	Female	WHOIII-WHOIV	Dead	0.435616
CGGA_871	<45	Male	WHOI-WHOII	Alive	10.8603
CGGA_864	<45	Male	WHOI-WHOII	Alive	10.8959
CGGA_859	>=45	Male	WHOIII-WHOIV	Dead	1.06027
CGGA_858	<45	Male	WHOI-WHOII	Alive	10.9151
CGGA_856	>=45	Male	WHOI-WHOII	Alive	3.55342
CGGA_850	>=45	Female	WHOIII-WHOIV	Alive	1.54521
CGGA_848	>=45	Female	WHOIII-WHOIV	Alive	0.654795
CGGA_843	<45	Male	WHOI-WHOII	Alive	10.9726
CGGA_842	>=45	Female	WHOIII-WHOIV	Dead	0.558904
CGGA_838	<45	Female	WHOI-WHOII	Alive	10.989
CGGA_837	>=45	Male	WHOIII-WHOIV	Dead	1.18356
CGGA_835	<45	Male	WHOI-WHOII	Alive	1.41644
CGGA_834	<45	Male	WHOI-WHOII	Alive	10.9945
CGGA_822	>=45	Male	WHOIII-WHOIV	Dead	6.12877
CGGA_818	>=45	Male	WHOI-WHOII	Alive	11.0329
CGGA_815	>=45	Female	WHOI-WHOII	Dead	6.07945
CGGA_812	<45	Male	WHOI-WHOII	Alive	11.0548
CGGA_808	<45	Male	WHOIII-WHOIV	Alive	3.19726
CGGA_807	<45	Male	WHOI-WHOII	Alive	11.0685
CGGA_804	>=45	Female	WHOIII-WHOIV	Alive	1.68219
CGGA_802	<45	Male	WHOIII-WHOIV	Dead	1.86575
CGGA_796	>=45	Male	WHOI-WHOII	Alive	1.53151
CGGA_791	>=45	Male	WHOIII-WHOIV	Dead	0.690411
CGGA_789	>=45	Male	WHOIII-WHOIV	Dead	0.945205
CGGA_785	<45	Male	WHOI-WHOII	Dead	9.63562
CGGA_782	>=45	Male	WHOIII-WHOIV	Dead	0.791781
CGGA_773	>=45	Female	WHOIII-WHOIV	Dead	1.2137
CGGA_766	<45	Male	WHOI-WHOII	Alive	11.2411
CGGA_762	<45	Female	WHOI-WHOII	Alive	11.2466
CGGA_761	>=45	Male	WHOIII-WHOIV	Dead	5.0411
CGGA_760	<45	Female	WHOI-WHOII	Alive	11.2603
CGGA_759	<45	Male	WHOIII-WHOIV	Dead	3.46027
CGGA_757	>=45	Male	WHOI-WHOII	Dead	2.86849
CGGA_752	<45	Male	WHOI-WHOII	Alive	10.0822
CGGA_747	<45	Male	WHOIII-WHOIV	Dead	2.65753
CGGA_738	<45	Male	WHOI-WHOII	Alive	11.3205
CGGA_731	>=45	Male	WHOIII-WHOIV	Dead	1.37808
CGGA_727	>=45	Male	WHOIII-WHOIV	Dead	2.80274
CGGA_725	>=45	Male	WHOI-WHOII	Alive	11.3616
CGGA_715	<45	Male	WHOI-WHOII	Alive	9.39452
CGGA_710	<45	Male	WHOIII-WHOIV	Dead	1.80822
CGGA_704	<45	Male	WHOI-WHOII	Dead	7.04658
CGGA_700	<45	Female	WHOIII-WHOIV	Alive	0.465753
CGGA_698	>=45	Female	WHOI-WHOII	Dead	5.07123
CGGA_694	<45	Male	WHOI-WHOII	Dead	3.27123
CGGA_689	<45	Female	WHOI-WHOII	Alive	11.4904
CGGA_685	<45	Female	WHOI-WHOII	Dead	8.87397
CGGA_680	<45	Male	WHOIII-WHOIV	Dead	6.50137
CGGA_679	>=45	Female	WHOIII-WHOIV	Dead	0.720548
CGGA_678	>=45	Male	WHOIII-WHOIV	Dead	1.05753
CGGA_676	>=45	Male	WHOIII-WHOIV	Dead	1.03014
CGGA_675	<45	Female	WHOI-WHOII	Alive	11.5342
CGGA_671	<45	Female	WHOI-WHOII	Alive	11.5479
CGGA_669	>=45	Female	WHOIII-WHOIV	Dead	1.66301
CGGA_666	>=45	Female	WHOI-WHOII	Dead	6.84658
CGGA_662	>=45	Female	WHOI-WHOII	Dead	0.778082
CGGA_659	>=45	Female	WHOI-WHOII	Alive	2
CGGA_658	>=45	Male	WHOIII-WHOIV	Dead	1.01918
CGGA_655	<45	Male	WHOI-WHOII	Alive	11.5918
CGGA_643	>=45	Male	WHOIII-WHOIV	Dead	0.906849
CGGA_642	<45	Male	WHOI-WHOII	Alive	11.6411
CGGA_641	>=45	Female	WHOIII-WHOIV	Dead	9.34521
CGGA_638	<45	Male	WHOI-WHOII	Alive	6.53699
CGGA_635	>=45	Male	WHOI-WHOII	Alive	11.6795
CGGA_633	>=45	Female	WHOI-WHOII	Dead	4.96438
CGGA_632	<45	Female	WHOI-WHOII	Dead	1.57808
CGGA_630	<45	Male	WHOIII-WHOIV	Alive	11.7808
CGGA_624	>=45	Female	WHOIII-WHOIV	Dead	0.334247
CGGA_616	<45	Male	WHOIII-WHOIV	Dead	2.60822
CGGA_607	<45	Male	WHOI-WHOII	Alive	3.80548
CGGA_605	<45	Male	WHOIII-WHOIV	Alive	11.7808
CGGA_604	>=45	Male	WHOIII-WHOIV	Dead	1.04384
CGGA_603	<45	Male	WHOIII-WHOIV	Alive	0.460274
CGGA_601	<45	Male	WHOI-WHOII	Dead	3.10411
CGGA_599	>=45	Female	WHOIII-WHOIV	Dead	1.14521
CGGA_598	>=45	Female	WHOIII-WHOIV	Dead	10.074
CGGA_591	>=45	Female	WHOIII-WHOIV	Dead	4.53151
CGGA_580	<45	Male	WHOI-WHOII	Dead	3.81918
CGGA_578	>=45	Female	WHOIII-WHOIV	Dead	0.991781
CGGA_565	>=45	Male	WHOIII-WHOIV	Alive	9.87671
CGGA_564	>=45	Male	WHOIII-WHOIV	Dead	1.86027
CGGA_560	<45	Male	WHOIII-WHOIV	Alive	11.9288
CGGA_551	<45	Male	WHOI-WHOII	Alive	11.9534
CGGA_545	<45	Female	WHOIII-WHOIV	Dead	1.52055
CGGA_543	<45	Male	WHOI-WHOII	Alive	11.9753
CGGA_541	<45	Female	WHOI-WHOII	Alive	11.989
CGGA_525	>=45	Male	WHOIII-WHOIV	Dead	0.378082
CGGA_510	<45	Male	WHOIII-WHOIV	Alive	12.063
CGGA_502	<45	Male	WHOI-WHOII	Alive	12.0932
CGGA_501	<45	Male	WHOI-WHOII	Alive	12.1288
CGGA_499	>=45	Male	WHOIII-WHOIV	Dead	0.334247
CGGA_494	>=45	Female	WHOIII-WHOIV	Alive	12.1507
CGGA_493	<45	Female	WHOI-WHOII	Dead	6.52603
CGGA_491	<45	Female	WHOIII-WHOIV	Dead	2.94247
CGGA_490	<45	Female	WHOIII-WHOIV	Alive	10.4219
CGGA_488	<45	Male	WHOIII-WHOIV	Dead	1.19178
CGGA_485	<45	Male	WHOI-WHOII	Alive	6.67671
CGGA_483	>=45	Female	WHOIII-WHOIV	Dead	0.758904
CGGA_479	<45	Female	WHOI-WHOII	Alive	12.1781
CGGA_458	>=45	Male	WHOI-WHOII	Dead	1.14795
CGGA_448	>=45	Male	WHOIII-WHOIV	Dead	0.969863
CGGA_446	<45	Female	WHOI-WHOII	Alive	12.3507
CGGA_431	<45	Male	WHOIII-WHOIV	Alive	12.3699
CGGA_426	>=45	Male	WHOIII-WHOIV	Dead	4.27397
CGGA_413	>=45	Male	WHOIII-WHOIV	Alive	0.50137
CGGA_400	<45	Female	WHOIII-WHOIV	Dead	3.61918
CGGA_374	<45	Male	WHOIII-WHOIV	Dead	1.35068
CGGA_337	>=45	Female	WHOIII-WHOIV	Dead	2.76164
CGGA_333	<45	Male	WHOI-WHOII	Alive	4.88493
CGGA_330	>=45	Male	WHOIII-WHOIV	Dead	3.07123
CGGA_323	>=45	Female	WHOI-WHOII	Alive	11.8849
CGGA_318	<45	Female	WHOIII-WHOIV	Dead	0.608219
CGGA_314	<45	Male	WHOIII-WHOIV	Dead	7.03562
CGGA_300	<45	Female	WHOI-WHOII	Dead	6.02466
CGGA_283	>=45	Female	WHOI-WHOII	Dead	9.50685
CGGA_276	<45	Male	WHOI-WHOII	Alive	1.44932
CGGA_274	>=45	Female	WHOIII-WHOIV	Alive	1.67123
CGGA_273	<45	Female	WHOI-WHOII	Dead	7.21918
CGGA_272	>=45	Male	WHOIII-WHOIV	Dead	0.594521
CGGA_269	>=45	Female	WHOI-WHOII	Alive	8.03288
CGGA_267	<45	Male	WHOI-WHOII	Dead	3.76438
CGGA_261	<45	Male	WHOI-WHOII	Alive	11.3151
CGGA_256	<45	Male	WHOI-WHOII	Alive	0.432877
CGGA_254	<45	Male	WHOI-WHOII	Alive	13.1315
CGGA_252	<45	Female	WHOI-WHOII	Alive	0.452055
CGGA_251	>=45	Male	WHOI-WHOII	Alive	3.5589
CGGA_247	>=45	Male	WHOIII-WHOIV	Dead	1.66849
CGGA_245	<45	Female	WHOIII-WHOIV	Dead	0.871233
CGGA_243	<45	Female	WHOI-WHOII	Alive	8.15616
CGGA_241	<45	Male	WHOI-WHOII	Alive	13.1753
CGGA_236	>=45	Male	WHOI-WHOII	Alive	1.93425
CGGA_235	<45	Male	WHOI-WHOII	Dead	6.41096
CGGA_1475	<45	Male	WHOIII-WHOIV	Dead	0.49863
CGGA_1460	>=45	Male	WHOIII-WHOIV	Dead	0.572603
CGGA_1450	<45	Male	WHOIII-WHOIV	Dead	2.62192
CGGA_1412	>=45	Female	WHOIII-WHOIV	Dead	0.810959
CGGA_1411	<45	Female	WHOIII-WHOIV	Dead	0.90137
CGGA_1409	<45	Female	WHOIII-WHOIV	Alive	7.47123
CGGA_1408	>=45	Female	WHOIII-WHOIV	Dead	3.73151
CGGA_1406	<45	Male	WHOI-WHOII	Dead	5.90137
CGGA_1394	<45	Male	WHOIII-WHOIV	Dead	0.380822
CGGA_1393	<45	Male	WHOIII-WHOIV	Dead	0.753425
CGGA_1388	<45	Male	WHOIII-WHOIV	Dead	1.32877
CGGA_1384	<45	Female	WHOIII-WHOIV	Dead	0.523288
CGGA_1381	<45	Female	WHOIII-WHOIV	Dead	0.126027
CGGA_1375	>=45	Female	WHOIII-WHOIV	Dead	0.252055
CGGA_1374	<45	Male	WHOIII-WHOIV	Dead	0.386301
CGGA_1370	<45	Male	WHOIII-WHOIV	Alive	0.890411
CGGA_1346	>=45	Female	WHOIII-WHOIV	Dead	0.778082
CGGA_1343	<45	Male	WHOIII-WHOIV	Dead	0.257534
CGGA_1342	>=45	Male	WHOIII-WHOIV	Dead	0.509589
CGGA_1340	<45	Male	WHOIII-WHOIV	Dead	3.03836
CGGA_1338	>=45	Female	WHOIII-WHOIV	Dead	3.07397
CGGA_1332	>=45	Female	WHOIII-WHOIV	Alive	1.39726
CGGA_1330	>=45	Male	WHOI-WHOII	Alive	7.79726
CGGA_1329	<45	Female	WHOIII-WHOIV	Dead	0.893151
CGGA_1324	<45	Male	WHOIII-WHOIV	Dead	2.32329
CGGA_1322	<45	Male	WHOIII-WHOIV	Dead	0.693151
CGGA_1320	<45	Male	WHOIII-WHOIV	Dead	0.161644
CGGA_1314	<45	Female	WHOIII-WHOIV	Dead	0.471233
CGGA_1313	<45	Male	WHOIII-WHOIV	Dead	1.03836
CGGA_1307	<45	Female	WHOIII-WHOIV	Alive	2.64384
CGGA_1301	>=45	Male	WHOIII-WHOIV	Dead	0.654795
CGGA_1299	>=45	Male	WHOIII-WHOIV	Dead	1.50685
CGGA_1292	<45	Male	WHOIII-WHOIV	Alive	7.94795
CGGA_1287	<45	Male	WHOIII-WHOIV	Dead	1.46027
CGGA_1285	>=45	Female	WHOIII-WHOIV	Dead	0.216438
CGGA_1284	>=45	Male	WHOIII-WHOIV	Dead	0.265753
CGGA_1283	<45	Male	WHOIII-WHOIV	Dead	0.0547945
CGGA_1281	>=45	Male	WHOIII-WHOIV	Alive	7.96986
CGGA_1280	>=45	Male	WHOIII-WHOIV	Dead	1.22466
CGGA_1275	>=45	Male	WHOIII-WHOIV	Dead	0.50137
CGGA_1272	<45	Male	WHOIII-WHOIV	Dead	0.339726
CGGA_1271	<45	Male	WHOIII-WHOIV	Dead	1.43288
CGGA_1270	>=45	Female	WHOIII-WHOIV	Dead	0.515068
CGGA_1263	>=45	Male	WHOIII-WHOIV	Dead	2.11507
CGGA_1258	<45	Male	WHOIII-WHOIV	Dead	0.312329
CGGA_1251	<45	Female	WHOIII-WHOIV	Dead	0.745205
CGGA_1246	>=45	Male	WHOIII-WHOIV	Alive	8.14247
CGGA_1240	<45	Male	WHOIII-WHOIV	Dead	0.0520548
CGGA_1237	>=45	Male	WHOIII-WHOIV	Dead	0.810959
CGGA_1234	<45	Male	WHOIII-WHOIV	Dead	1.93151
CGGA_1231	<45	Female	WHOIII-WHOIV	Dead	6.24384
CGGA_1227	>=45	Female	WHOIII-WHOIV	Dead	3.27945
CGGA_1224	>=45	Male	WHOIII-WHOIV	Dead	0.742466
CGGA_1219	>=45	Female	WHOIII-WHOIV	Dead	5.80822
CGGA_1218	>=45	Male	WHOIII-WHOIV	Dead	0.783562
CGGA_1216	<45	Male	WHOIII-WHOIV	Dead	0.854795
CGGA_1215	<45	Male	WHOIII-WHOIV	Dead	0.0794521
CGGA_1214	>=45	Female	WHOIII-WHOIV	Dead	1.65479
CGGA_1197	<45	Male	WHOIII-WHOIV	Dead	2.58082
CGGA_1190	>=45	Female	WHOIII-WHOIV	Alive	8.44384
CGGA_1189	<45	Female	WHOIII-WHOIV	Alive	8.44384
CGGA_1188	<45	Female	WHOIII-WHOIV	Dead	0.70137
CGGA_1180	>=45	Female	WHOIII-WHOIV	Alive	3.3589
CGGA_1177	<45	Male	WHOIII-WHOIV	Dead	1.23014
CGGA_1175	<45	Female	WHOIII-WHOIV	Dead	1.20822
CGGA_1171	<45	Male	WHOIII-WHOIV	Dead	1.12877
CGGA_1170	<45	Male	WHOIII-WHOIV	Dead	0.947945
CGGA_1160	<45	Female	WHOIII-WHOIV	Dead	1.16712
CGGA_1146	<45	Male	WHOIII-WHOIV	Alive	6.84384
CGGA_1145	<45	Male	WHOIII-WHOIV	Dead	0.654795
CGGA_1140	>=45	Female	WHOIII-WHOIV	Dead	2.52329
CGGA_1139	>=45	Female	WHOIII-WHOIV	Dead	3.27671
CGGA_1136	<45	Female	WHOIII-WHOIV	Dead	0.646575
CGGA_1129	<45	Male	WHOIII-WHOIV	Dead	0.460274
CGGA_1124	>=45	Male	WHOIII-WHOIV	Dead	1.32603
CGGA_1119	>=45	Male	WHOIII-WHOIV	Dead	1.15616
CGGA_1118	<45	Male	WHOIII-WHOIV	Dead	1.09041
CGGA_1116	<45	Female	WHOIII-WHOIV	Dead	0.679452
CGGA_1114	>=45	Male	WHOIII-WHOIV	Dead	1.26027
CGGA_1113	<45	Male	WHOIII-WHOIV	Dead	3.46575
CGGA_1109	<45	Male	WHOIII-WHOIV	Dead	3.69315
CGGA_1105	<45	Male	WHOIII-WHOIV	Dead	1.66849
CGGA_1099	<45	Male	WHOIII-WHOIV	Dead	0.334247
CGGA_1094	<45	Female	WHOIII-WHOIV	Dead	0.690411
CGGA_1091	>=45	Female	WHOIII-WHOIV	Dead	3.05753
CGGA_1083	>=45	Male	WHOIII-WHOIV	Dead	1.23288
CGGA_1081	<45	Female	WHOIII-WHOIV	Dead	0.591781
CGGA_1079	<45	Male	WHOIII-WHOIV	Dead	1.29041
CGGA_1078	>=45	Female	WHOIII-WHOIV	Dead	0.863014
CGGA_1077	>=45	Male	WHOIII-WHOIV	Dead	1.61918
CGGA_1074	>=45	Male	WHOIII-WHOIV	Dead	0.235616
CGGA_1073	<45	Female	WHOIII-WHOIV	Dead	0.739726
CGGA_1072	<45	Male	WHOIII-WHOIV	Dead	2.9863
CGGA_1071	<45	Male	WHOI-WHOII	Dead	8.90959
CGGA_1070	<45	Male	WHOIII-WHOIV	Dead	0.912329
CGGA_1068	<45	Male	WHOIII-WHOIV	Dead	0.186301
CGGA_1061	<45	Female	WHOIII-WHOIV	Dead	1.45753
CGGA_1060	<45	Male	WHOIII-WHOIV	Dead	0.621918
CGGA_1059	>=45	Female	WHOI-WHOII	Dead	0.0575342
CGGA_1053	>=45	Female	WHOIII-WHOIV	Dead	1.0137
CGGA_1049	>=45	Male	WHOIII-WHOIV	Dead	2.21644
CGGA_1045	>=45	Male	WHOIII-WHOIV	Dead	0.953425
CGGA_1039	<45	Male	WHOIII-WHOIV	Dead	1.99178
CGGA_1035	>=45	Female	WHOIII-WHOIV	Dead	1.55342
CGGA_1034	<45	Male	WHOIII-WHOIV	Dead	2.06301
CGGA_1031	<45	Female	WHOI-WHOII	Dead	6.73151
CGGA_1027	<45	Male	WHOIII-WHOIV	Alive	7.36438
CGGA_1026	>=45	Male	WHOIII-WHOIV	Dead	4.30137
CGGA_1024	>=45	Male	WHOIII-WHOIV	Dead	8.42192
CGGA_1023	>=45	Female	WHOIII-WHOIV	Dead	1.86575
CGGA_1022	>=45	Female	WHOI-WHOII	Alive	1.41918
CGGA_1020	<45	Female	WHOI-WHOII	Dead	3.06849
CGGA_1019	>=45	Male	WHOIII-WHOIV	Dead	0.580822
CGGA_1015	>=45	Male	WHOIII-WHOIV	Dead	0.449315
CGGA_1013	<45	Female	WHOI-WHOII	Dead	4.72603
CGGA_1011	>=45	Female	WHOIII-WHOIV	Dead	0.29863
CGGA_1008	>=45	Female	WHOIII-WHOIV	Dead	0.863014
CGGA_1007	>=45	Female	WHOIII-WHOIV	Dead	0.945205
CGGA_1006	<45	Male	WHOIII-WHOIV	Dead	0.69589
CGGA_1005	<45	Female	WHOI-WHOII	Alive	10.4521
CGGA_1004	>=45	Female	WHOI-WHOII	Dead	2.46301
CGGA_1001	<45	Male	WHOIII-WHOIV	Alive	10.4575
